# Supplementary material
Source: publisher figshare collection journal article supplement (https://tandf.figshare.com/articles/dataset/_/28433991)
Supplement: Supplementary file 1 [file 1]

**Highlights**

- This work proposes an approach called Elliptic Curve Cryptography (ECC) with the Adaptive Hunter Prey Optimization (AHPO) algorithm for providing data security in IoT.
- The encryption technique ECC provides a robust and lightweight encryption mechanism and the AHPO is employed for optimal key generation and management processes, enhancing both security and efficiency.
- Then, the encrypted data is hashed by the MD-5 algorithm.
- The suggested model addresses the need for reduced computational load and power consumption in IoT environments and maintaining a high level of security.
- Experimental outcomes demonstrate the efficacy of this approach in optimizing cryptographic operations, making it a feasible solution to secure IoT networks.
